# Supplementary material for: Rapid low-temperature solution growth of ZnO:Co nanorod arrays with controllable visible light absorption
Source: Royal Society of Chemistry journal article supplement (doi:10.1039/c7ce00378a), 2017-01-01
Supplement: c7ce00378a3.pdf [file c7ce00378a3.pdf]

## Electronic Supplementary Information

### Rapid low-temperature solution growth of ZnO:Co nanorod arrays with controllable visible light absorption

Jan Kegel,<sup>a\*</sup> Jennifer Halpin,<sup>a</sup> Fathima Laffir,<sup>b</sup> Ian M. Povey,<sup>a</sup> Martyn E. Pemble<sup>a,c</sup>

<sup>a</sup> Tyndall National Institute, University College Cork, Lee Maltings, Cork, Ireland.

<sup>b</sup> Bernal Institute, University of Limerick, Limerick, Ireland.

<sup>c</sup> Department of Chemistry, University College Cork, Cork, Ireland.

\* Corresponding author: jan.kegel@tyndall.ie

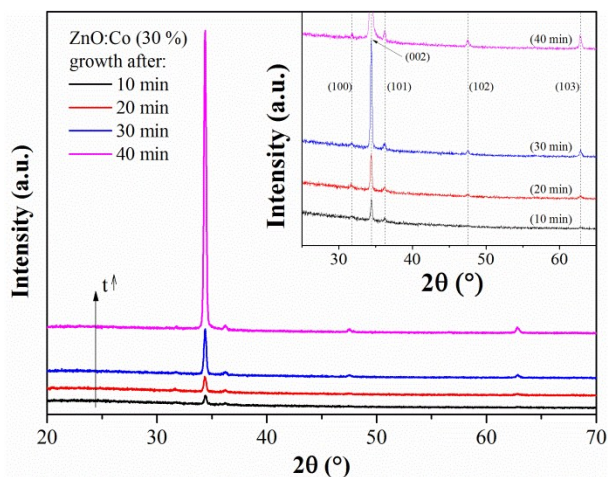

**Fig. S1** XRD spectra of ZnO:Co nanorod-arrays with 30 % Co/Zn concentration ratio in the growth solution measured at different stages of the growth process. Inset: magnified view on the range  $2\theta = 25 - 65^\circ$ . For all samples only ZnO related XRD peaks were detected.
