# Supplementary figures and images for: Rapid low-temperature solution growth of ZnO:Co nanorod arrays with controllable visible light absorption
Source: Royal Society of Chemistry journal article supplement (doi:10.1039/c7ce00378a), 2017-01-01

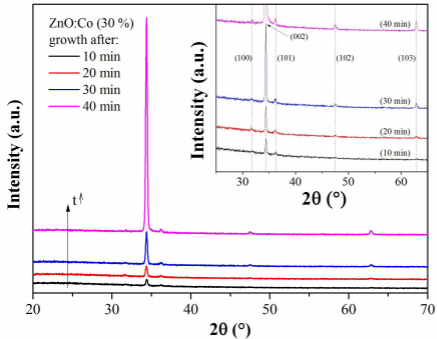

Supplement: c7ce00378a2.pdf [file c7ce00378a2.pdf]
